# Supplementary material
Source: ML conference proceedings conference paper supplement (https://proceedings.neurips.cc/paper_files/paper/2019/hash/9e984c108157cea74c894b5cf34efc44-Abstract.html)
Supplement: Supplementary file [file 9e984c108157cea74c894b5cf34efc44-Supplemental.zip]

# Appendices

**Organization.** In Section [A](#), we analysis the issues in the proof of [Agrawal & Jia, 2017]. In Section [B](#), we give some basic lemmas (mainly concentration inequalities). Section [C](#) is devoted to the missing proofs in the analysis of Theorem 1. At last, we present the proof of Corollary 1 in Section [D](#).

## A Mistake in the Analysis of Previous Work

In this section we mainly analysis the mistake in the proof of Lemma C.2 and Lemma C.1 [Agrawal & Jia, 2017]. The lemma can be described as

**Lemma 6** (Lemma C.2, Agrawal & Jia, 2017). *Let  $\hat{p}$  be the average of  $n$  independent multinoulli trials with parameter  $p \in \Delta^S$ . Let*

$$Z := \max_{v \in [0, D]^S} (\hat{p} - p)^T v.$$

*Then  $Z \leq D\sqrt{\frac{2\log(1/\rho)}{n}}$ , with probability  $1 - \rho$ .*

We give a counter example as following. Suppose  $D = 2$ ,  $p_i = \frac{1}{S}$  for each  $1 \leq i \leq S$ , then we have  $Z = \max_{v \in [0, 2]^S} (\hat{p} - p)^T v = \max_{v \in [0, 2]^S} (\hat{p} - p)^T (v - \mathbf{1}) = \max_{v \in [-1, 1]^S} (\hat{p} - p)^T v = \sum_{i=1}^S |\hat{p}_i - \frac{1}{S}|$ , and  $\mathbb{E}[Z] = \sum_{i=1}^S \mathbb{E}[|\hat{p}_i - \frac{1}{S}|] = S\mathbb{E}[|\hat{p}_1 - \frac{1}{S}|]$  due to symmetry of  $p$ . Therefore,  $\mathbb{E}[Z] = S\mathbb{E}[|\hat{p}_1 - \frac{1}{S}|] \geq (1 - \frac{1}{S})^n$ . On the other hand, if Lemma [6](#) is right, by setting  $\rho = \frac{1}{n}$  we have  $\mathbb{E}[Z] \leq \sqrt{\frac{2\log(n)}{n}} + \frac{1}{n}$ . Letting  $S \rightarrow \infty$ , it follows that  $1 = \lim_{S \rightarrow \infty} (1 - \frac{1}{S})^n \leq 2\sqrt{\frac{2\log(n)}{n}} + \frac{2}{n}$ , which is wrong when  $n \geq 30$ .

**Lemma 7** (Lemma C.1 [Agrawal & Jia, 2017]). *Let  $\tilde{p} \sim \text{Dirichlet}(m\bar{p})$ . Let*

$$Z := \max_{v \in [0, D]^S} (\tilde{p} - \bar{p})^T v.$$

*Then,  $Z \leq D\sqrt{\frac{2\log(2/\rho)}{m}}$ , with probability  $1 - \rho$ .*

Again, to build a counter example, let  $D = 2$ ,  $\bar{p}_i = \frac{1}{S}$  for any  $i$ .  $\mathbb{E}[Z] = S\mathbb{E}[|\tilde{p}_1 - \frac{1}{S}|] \geq \frac{1}{2}(\mathbb{P}(\tilde{p}_1 < \frac{1}{2S}) + \mathbb{P}(\tilde{p}_1 > \frac{3}{2S}))$ . Note that  $\tilde{p}_1 \sim \text{Beta}(\frac{m}{S}, m - \frac{m}{S})$ . When  $m > 1$  and  $S > m$ , the density function of  $\tilde{p}_1$  is  $\frac{x^{\frac{m}{S}-1}(1-x)^{m-\frac{m}{S}}}{B(\frac{m}{S}, m-\frac{m}{S})}$  for  $x \in (0, 1)$ , which is decreasing in  $x$ . Therefore, we have that  $\mathbb{P}(\tilde{p}_1 < \frac{1}{2S}) \geq \frac{1}{2}\mathbb{P}(\frac{1}{2S} \leq \tilde{p}_1 \leq \frac{3}{2S}) = \frac{1}{2}(1 - (\mathbb{P}(\tilde{p}_1 < \frac{1}{2S}) + \mathbb{P}(\tilde{p}_1 > \frac{3}{2S})))$ , and thus  $\mathbb{P}(\tilde{p}_1 < \frac{1}{2S}) + \mathbb{P}(\tilde{p}_1 > \frac{3}{2S}) \geq \frac{1}{3}$ . As a result,  $\mathbb{E}[Z] \geq \frac{1}{6}$ , which contradicts to Lemma [7](#). Moreover, we find that the mistake in their proof lies in the derivation

$$\begin{aligned} \mathbb{E}[DY - Z|Z = z : z \in \mathcal{E}_v] &= \mathbb{E}[DY - D\mathbb{E}[Y_v - Z|Z = z : z \in \mathcal{E}_v]] \\ &= \mathbb{E}[DY_v - D\mathbb{E}[Y_v] - (\hat{p} - p)^T v | (\hat{p} - p)^T v] \\ &= \mathbb{E}[DY_v - \hat{p}^T v | \hat{p}^T v] = 0 \end{aligned}$$

Actually,  $\{Z = z : z \in \mathcal{E}_v\} \subsetneq \{Z = z : z = (\hat{p} - p)^T v\}$  because given the value of  $Z = z$ , it's still unknown that which  $v$  is selected to maximize  $(\hat{p} - p)^T v$ . More rigorously, we have  $\mathbb{E}[\mathbb{E}[DY_v - \hat{p}^T v|Z = z, z \in \mathcal{E}_v]|Z \in \mathcal{E}_v] = \mathbb{E}[DY_v - \hat{p}^T v|Z \in \mathcal{E}_v] = p^T v - \mathbb{E}[\hat{p}^T v|Z \in \mathcal{E}_v] < 0$ , since  $(\hat{p} - p)^T v > 0$  conditioning on  $Z$  in  $\mathcal{E}_v$  (except for  $\hat{p} = p$ ). This contradicts to the analysis of Lemma C.2 in [Agrawal & Jia, 2017], which says that  $\mathbb{E}[DY_v - \hat{p}^T v|Z = z, z \in \mathcal{E}_v] = 0$ .

Therefore, the algorithm in [Agrawal & Jia, 2017] may not reach the regret bound of  $\tilde{O}(D\sqrt{SAT})$ .

## B Some Basic Lemmas

In this section, we present some useful lemmas. Some of them are well known so that we omit the proof.

**Lemma 8** (Azuma's Inequality). Suppose  $\{X_k\}_{k=0,1,2,3,\dots}$  is a martingale and  $|X_{k+1} - X_k| < c$ . Then for all positive integers  $N$  and all positive  $t$ ,

$$\mathbb{P}(|X_N - X_0| \geq t) \leq 2\exp\left(\frac{-t^2}{2Nc^2}\right). \quad (16)$$

Let  $t = c\sqrt{2N \log(2/\delta)}$ , then  $\mathbb{P}(|X_N - X_0| \geq t) \leq \delta$ .

**Lemma 9** (Bernstein Inequality). Let  $\{X_k\}_{k \geq 1}$  be independent zero-mean random variables. Suppose that  $|X_k| \leq M$  for all  $k$ . Then, for all positive  $t$

$$\mathbb{P}\left(\left|\sum_{k=1}^n X_k\right| \geq t\right) \leq 2\exp\left(-\frac{t^2}{2(\sum_{k=1}^n E[X_k^2] + \frac{1}{3}Mt)}\right). \quad (17)$$

Let  $t = 2\sqrt{\sum_{k=1}^n E[X_k^2] \log(2/\delta)} + 2M \log(2/\delta)$ , then  $\mathbb{P}(|\sum_{k=1}^n X_k| \geq t) \leq \delta$ .

**Lemma 10.** Let  $\hat{p}_n$  be the average of  $n$  independent multinomial trials with parameter  $p \in \Delta^m$ . Then, for any fixed vector  $u \in \mathbb{R}^m$ , with probability  $1 - \delta$ , it holds that

$$|(\hat{p}_n - p)^T u| \leq 2\sqrt{\frac{V(p, u)\gamma}{n}} + 2\frac{sp(u)\gamma}{n}.$$

*Proof.* Given  $u \in \mathbb{R}^m$  and  $p \in \Delta^m$ , let  $\{X_k\}_{k \geq 1}$  be i.i.d. random variable s.t.  $\mathbb{P}(X_k = u_i - p^T u) = p_i, \forall k$ . Because  $E[X_k^2] = V(p, u)$  and  $\frac{1}{n} \sum_{k=1}^n X_k = (\hat{p}_n - p)^T u$ , according to Lemma 9 we get that

$$\mathbb{P}(|(\hat{p}_n - p)^T u| \geq 2\sqrt{\frac{V(p, u)\gamma}{n}} + 2\frac{sp(u)\gamma}{n}) \leq \delta.$$

□

**Lemma 11** (Freedman (1975)). Let  $(M_n)_{n \geq 0}$  be a martingale such that  $M_0 = 0$ . Let  $V_n = \sum_{k=1}^n \mathbb{E}[(M_k - M_{k-1})^2 | \mathcal{F}_{k-1}]$  for  $n \geq 0$ , where  $\mathcal{F}_k = \sigma(M_1, M_2, \dots, M_k)$ . Then, for any positive  $x$  and for any positive  $y$ ,

$$\mathbb{P}(M_n \geq nx, V_n \leq ny) \leq \exp\left(-\frac{nx^2}{2(y + \frac{1}{3}x)}\right). \quad (18)$$

**Lemma 12.** Suppose  $M$  is a flat MDP. Let  $h$  and  $\rho$  denote the optimal bias function and the optimal average reward respectively. We run  $N$  steps under  $M$  and get a trajectory  $L$  of length  $N$ . Then we have, no matter which action is chosen in each step, for each  $n \in [N]$ , with probability  $1 - \delta$ , it holds that

$$\left|\sum_{i=1}^n (r_i - \rho)\right| \leq (2\sqrt{n\gamma} + 1)sp(h). \quad (19)$$

Moreover, suppose that the reward is bounded in  $[0, 1]$ ,  $n \geq 4\gamma sp(h)^2$  and  $sp(h) \geq 10$ , then with probability  $1 - \delta$  it holds that

$$\left|\sum_{i=1}^n (r_i - \rho)\right| \leq 4\sqrt{n\gamma sp(h)} + sp(h). \quad (20)$$

*Proof.* Let  $M_0 = h_{s_1}$  and  $M_n - M_{n-1} = h_{s_{n+1}} - h_{s_n} + r_n - \rho$  for  $n \geq 1$ . Then  $\{M_n - M_0\}_{n \geq 0}$  is a martingale martingale difference sequence since  $\mathbb{E}[h_{s_{n+1}} - h_{s_n} + r_n - \rho | \mathcal{F}_{n-1}] = \sum_a \mathbb{P}(a_t = a)[E][h_{s_{n+1}} - h_{s_n} + r_n - \rho | \mathcal{F}_{n-1}, a_t = a] = \sum_a \mathbb{P}(a_t = a)(P_{s_n, a}^T h - h_{s_n} + r_{s_n, a} - \rho) = 0$ . Because  $|M_n - M_{n-1}| \leq \max_a |P_{s_n, a}^T h - h_{s_n}| \leq sp(h)$ ,  $V_n \leq nsp(h)^2$ . Plug  $y = sp(h)^2$  and  $x = \frac{2\sqrt{\gamma sp(h)}}{\sqrt{n}}$  into (18), then (19) follows easily. To prove (20), we need to provide a tighter bound for  $V_n$ . For  $v \in \mathbb{R}^S$ , we use  $v^2$  to denote the vector  $[v_1^2, v_2^2, \dots, v_S^2]^T$ . Because  $V_n = \sum_{k=1}^n \mathbb{E}[(M_k - M_{k-1})^2 | \mathcal{F}_{k-1}] = \sum_{k=1}^n P_{s_k, a_k}^T h^2 - (P_{s_k, a_k}^T h)^2$  and  $P_{s_k, a_k}^T h - h_{s_k} = \rho - r_{s_k, a_k}$ , we have that

$$V_n \leq \sum_{k=1}^n (P_{s_k, a_k}^T h^2 - h_{s_k}^2) + \sum_{k=1}^n (sp(h)|\rho - r_{s_k, a_k}| + (\rho - r_{s_k, a_k})^2).$$

By the assumption the reward is bounded in  $[0, 1]$ , we have  $\rho \in [0, 1]$  and  $|\rho - r_{s_k, a_k}| \leq 1$ . Let  $X_n = \sum_{k=1}^n (P_{s_k, a_k}^T h^2 - h_{s_{k+1}}^2) = V_n + h_{s_{n+1}}^2 - h_{s_1}^2$  for  $n \geq 1$  and  $X_0 = 0$ . It's clear  $\{X_n\}_{n \geq 0}$  is a martingale difference sequence and  $|X_k - X_{k-1}| \leq sp(h)^2$ . According to Lemma 8, we have that

$$P(|X_n| \geq \sqrt{2n\gamma} sp(h)^2) \leq \delta$$

Then it follows that with probability  $1 - \delta$ ,  $|V_n| \leq (\sqrt{2n\gamma} + 1)sp(h)^2 + n(2sp(h) + 1)$ . When  $n \geq 4\gamma sp(h)^2$  and  $sp(h) \geq 10$ , we get  $|V_n| \leq 4nsp(h)$ . Again, plugging  $x = \frac{4\sqrt{\gamma} sp(h)}{\sqrt{n}}$  and  $y = 4sp(h)$  into (18), noticing that  $n \geq 16\gamma sp(h)$ , we conclude that, with probability  $1 - 2\delta$ ,  $|\sum_{i=1}^n (r_i - \rho)| \leq 4\sqrt{n\gamma} sp(h) + sp(h)$ .  $\square$

We introduce a technical lemma which is actually an expansion of Lemma 19, [Jaksch et al., 2010].

**Lemma 13.** Suppose  $\{x_n\}_{n=1}^N$  is sequence of positive real number with  $x_1 = 1$  and  $x_n \leq \sum_{i=1}^{n-1} x_i$  for  $n = 2, 3, \dots, N - 1$ . Then we have, for any  $0 < \alpha < 1$ ,

$$x_1 + \sum_{n=2}^N x_n \left( \sum_{i=1}^{n-1} x_i \right)^{-\alpha} \leq \frac{2^\alpha}{1-\alpha} \left( \sum_{n=1}^N x_n \right)^{1-\alpha}.$$

Moreover, in the case  $\alpha = 1$ , we have

$$x_1 + \sum_{n=2}^N x_n \left( \sum_{i=1}^{n-1} x_i \right)^{-1} \leq 1 + 2 \log \left( \sum_{n=1}^N x_n \right).$$

*Proof.* Let  $S_n = \sum_{1 \leq i \leq n} x_i$  for  $n \geq 1$ , then it follows  $2S_n \geq S_{n+1}$  for  $n \in [N - 1]$ . By basic calculus, when  $\alpha < 1$ , for  $n \geq 2$  we have

$$S_n^{1-\alpha} - S_{n-1}^{1-\alpha} \geq (1-\alpha)x_n S_n^{-\alpha} \geq \frac{1-\alpha}{2^\alpha} x_n S_{n-1}^{-\alpha}.$$

Note that  $S_1^{1-\alpha} = 1$ , we then have  $x_1 + \sum_{n=2}^N x_n S_{n-1}^{-\alpha} \leq 1 + \frac{2^\alpha}{1-\alpha} \sum_{n=2}^N (S_n^{1-\alpha} - S_{n-1}^{1-\alpha}) \leq \frac{2^\alpha}{1-\alpha} S_N^{1-\alpha} + 1 - \frac{2^\alpha}{1-\alpha} \leq \frac{2^\alpha}{1-\alpha} S_N^{1-\alpha}$ .

In the case  $\alpha = 1$ , for  $n \geq 2$  we have

$$\log(S_n) - \log(S_{n-1}) \geq \frac{x_n}{S_n} \geq \frac{x_n}{2S_{n-1}}.$$

Note that  $\log(S_1) = 0$ , we then have  $x_1 + \sum_{n=2}^N x_n S_{n-1}^{-1} \leq 1 + 2(\log(S_N) - \log(S_1)) = 1 + 2\log(S_N)$ .  $\square$

Applying Lemma 13 to  $\{v_{k,s,a}\}_{k \geq 1}$ , we have that for any  $0 < \alpha < 1$

$$\sum_k \frac{v_{k,s,a}}{\max\{N_{k,s,a}, 1\}^\alpha} \leq \frac{2^\alpha}{1-\alpha} (N_{s,a}^{(T)})^{1-\alpha}$$

Combining this inequality and Jenson's inequality, we get that

$$\sum_{k,s,a} \frac{v_{k,s,a}}{\max\{N_{k,s,a}, 1\}^\alpha} \leq \frac{2^\alpha}{1-\alpha} SA \left( \frac{T}{SA} \right)^{1-\alpha} \quad (21)$$

In the case  $\alpha = 1$ , we also have

$$\sum_{k,s,a} \frac{v_{k,s,a}}{\max\{N_{k,s,a}, 1\}} \leq SA + 2SA \log \left( \frac{T}{SA} \right) \quad (22)$$

With a slightly abuse of notations, we use  $N_{k,s,a}$  to denote  $\max\{N_{k,s,a}, 1\}$  in the rest of the paper for simplicity.

## C Missing Proofs in the Analysis of Theorem 1

In this section, we present the proofs of Lemma 1-5 and give a detailed proof of Theorem 1.

### C.1 Proof of Lemma 1

Let  $h \in \mathbb{R}^S$  and  $\rho \in \mathbb{R}$  be fixed. We define a Markov process  $X$  with state space  $\mathcal{S}$ . Let  $\{\mathcal{F}_t\}_{t \geq 1}$  be the corresponding filtered algebra, i.e.,  $\mathcal{F}_t = \sigma(X_1, \dots, X_t)$ . Let  $s_1$  be the initial state. For each state  $s$ , there are some actions and each action  $a$  is equipped with a transition probability vector  $p_{s,a}$  and a reward  $r'_{s,a} = h_s + \rho - p_{s,a}^T h$ . In the  $t$ -th step, there is a policy  $\pi_t$ . We select an action according to  $\pi_t$ , then execute it and reach the next state. We then have  $\mathbb{P}[p_t = p_{s_t,a}, r'_t = r'_{s_t,a}] = \pi_{t,a}$ , where  $p_t$  is transition probability and  $r'_t$  is the reward in current step.

Then it is clear  $\{(s_t, s_{t+1}, r'_t)\}_{t=1}^n$  is measurable with respect to  $\mathcal{F}_n$ . For any two different states  $s, s' \in \mathcal{S}$ , given a trajectory  $L = \{(s_t, s_{t+1}, r'_t)\}_{t=1}^n$ , we define an indicator function  $I_{s,s'}(L, t)$  as following:

If  $t \geq n+1$ ,  $I_{s,s'}(L, t) = 0$ . Otherwise, let  $U = \{i | s_i \in \{s, s'\}, 1 \leq i \leq t\}$ . If  $U$  is empty,  $I_{s,s'}(L, t) = 0$ ; else  $I_{s,s'}(L, t) = \mathbb{I}[s_{i^*} = s]$  where  $i^*$  be the maximal element of  $U$ .

Let  $L$  be the  $N$ -step trajectory of  $X$  and  $I_{s,s'}(t) = I_{s,s'}(L, t)$ . Note that  $I_{s,s'}(t)$  is a random variable, and it only depends on  $\{s_u\}_{u=1}^t$ , which is measurable with respect to  $\mathcal{F}_{t-1}$ . Let  $W_t = \sum_{u=1}^t I_{s,s'}(u)(r_u - h_{s_u} + h_{s_{u+1}} - \rho)$ , then we have  $\mathbb{E}[W_1] = 0$  and  $\mathbb{E}[W_t - W_{t-1} | \mathcal{F}_{t-1}] = 0$  for  $t \geq 2$ . It follows that  $\{W_t\}_{t=1}^N$  is a martingale with respect to  $\{\mathcal{F}_t\}_{t=1}^N$ . Because  $|W_t - W_{t-1}| = |I_{s,s'}(t)(r'_t - h_{s_t} + h_{s_{t+1}} - \rho^*)| \leq \max_a |I_{s,s'}(t)(h_{s_{t+1}} - p_{s_t,a}^T h)| \leq sp(h)$  and  $|W_1| \leq sp(h)$ , by [\(16\)](#), we have that, for any  $n \leq N$ ,

$$\mathbb{P}(|W_n| \geq \sqrt{2N\gamma}sp(h) + sp(h)) \leq \delta.$$

Then it follows that, with probability  $1 - N\delta$ , for any  $n \in [N]$ ,

$$|W_n| \leq \sqrt{2N\gamma}sp(h) + sp(h).$$

Recall the notations in Definition 4,  $ts_1(\mathcal{L}) := \min\{\min\{t | s_t = s\}, N+2\}$ ,

$$te_k(\mathcal{L}) := \min\{\min\{t | s_t = s', t > ts_k(\mathcal{L})\}, N+2\}, k \geq 1,$$

$$ts_k(\mathcal{L}) := \min\{\min\{t | s_t = s, t > te_{k-1}(\mathcal{L})\}, N+2\}, k \geq 2.$$

and  $c(s, s', \mathcal{L}) := \max\{k | te_k(\mathcal{L}) \leq N+1\}$ . According to the definition of  $I_{s,s'}(t)$ , for any  $c \in [c(s, s', \mathcal{L})]$ , we have

$$W_{te_c(\mathcal{L})-1} = \sum_{u=1}^c \left( \sum_{ts_u(\mathcal{L}) \leq t \leq te_u(\mathcal{L})-1} (r'_t - \rho) + h_{s'} - h_s \right).$$

Given an algorithm  $\mathcal{G}$ , we can view  $\mathcal{G}$  as a function which maps previous samples, policies and current state to a policy in current state, and we use  $\mathcal{G}_t := \mathcal{G}(s_t, (s_u, \pi_u, a_u, r_u, s_{u+1})_{u=1}^{t-1})$  to denote this policy. By setting  $h = h^*$ ,  $\rho = \rho^*$ ,  $p_{s,a} = P_{s,a}$  and  $\pi_t = \mathcal{G}_t$ , we have  $r_{s,a} = h_s^* + \rho^* - p_{s,a}^T h^* = r'_{s,a}$ , since  $M$  is flat. It then follows that

$$W_{te_c(\mathcal{L})-1} = \sum_{u=1}^c \left( \sum_{ts_u(\mathcal{L}) \leq t \leq te_u(\mathcal{L})-1} (r_t - \rho^*) + h_{s'} - h_s \right).$$

As we proved before, with probability  $1 - N\delta$ , it holds that for any  $1 \leq n \leq N$ ,

$$|W_n| \leq \sqrt{2N\gamma}sp(h) + sp(h).$$

Because  $1 \leq ts_c(\mathcal{L}) \leq te_c(\mathcal{L}) - 1 \leq N$  for any  $1 \leq c \leq c(s, s', \mathcal{L})$ , Lemma 1 follows easily.

### C.2 Proof of Lemma 2

Recall the definition of bad events.

$$\begin{aligned} B_{1,k} &:= \left\{ \exists (s, a), s.t. |(P_{s,a} - \hat{P}_{s,a}^{(k)})^T h^*| > 2\sqrt{\frac{V(P_{s,a}, h^*)\gamma}{N_{k,s,a}}} + 2\frac{sp(h^*\gamma)}{N_{k,s,a}} \right\}, \\ B_{2,k} &= \left\{ \exists (s, a, s'), s.t. |\hat{P}_{s,a,s'}^{(k)} - P_{s,a,s'}| > 2\sqrt{\frac{\hat{P}_{s,a,s'}^{(k)}}{N_{k,s,a}}} + \frac{3\gamma}{N_{k,s,a}} + \frac{4\gamma^{\frac{3}{4}}}{N_{k,s,a}^{\frac{3}{4}}} \right\}, \\ B_{3,k} &= \left\{ \left| \sum_{1 \leq t < t_k} (\rho^* - r_{s_t, a_t}) \right| > 26HS\sqrt{AT\gamma}, \sum_{k' < k} \sum_{s,a} v_{k',s,a} reg_{s,a} > 22HS\sqrt{AT\gamma} \right\} \\ B_{4,k} &= \{ (\pi^*, P^*, h^*, \rho^*) | \pi^* \text{ is a deterministic optimal policy} \} \cap \mathcal{M}_k = \emptyset \}, \end{aligned}$$

$B_k = B_{1,k} \cup B_{2,k} \cup B_{3,k} \cup B_{4,k}$  and  $B = \cup_{1 \leq k \leq K+1} B_k$ .

It's easy to see that for each  $k$ ,  $B_{1,k}$  and  $B_{2,k}$  indicate the events where the concentration inequalities fail, and thus have a small probability. Suppose  $B_{k'}^C$  occurs for each  $k' < k$ , we get that the regret before the  $k$ -th episode does not exceed  $\tilde{O}(HS\sqrt{AT})$  with high probability based on the analysis of REGAL.C.

To show  $\mathbb{P}(B_{4,k})$  is small, we prove that, conditioned on  $\cap_{1 \leq k' < k} B_{k'}^C$  occurs, with high probability, it holds that  $h^* \in \mathcal{H}$ . Let  $\pi^*$  be a deterministic optimal policy. Note that if (5)-(7) holds for any  $s, a, s'$  with  $P'(\pi) = P$  where  $P$  is the true transition model, we then have  $(\pi^*, P, h^*, \rho^*) \in \mathcal{M}_k$ , since (8) holds due to the optimality of  $\pi^*$ . Putting all together, we can bound  $\mathbb{P}(B)$  up to  $\tilde{O}(S^3 A^2 T) \delta$ .

Note that  $t_{K+1} - 1 = T$ , then  $B_{K+1}$  is also well defined. Firstly, for each  $k$ , according to Lemma 10, we have  $\mathbb{P}(B_{1,k}) \leq SA\delta$  directly.

To bound the probability of  $B_{2,k}$ , let  $(s, a)$  be fixed. Defining  $g(x) = [x, 1-x]^T$  for  $x \in [0, 1]$ . Then we have  $|x_1 - x_2| = \frac{1}{2} |g(x_1) - g(x_2)|_1 = \frac{1}{2} \sup_{y \in \{-1, 1\}^2} (g(x_1) - g(x_2))^T y$  for  $x_1, x_2 \in [0, 1]$ . It

follows that  $\mathbb{P}(|x_1 - x_2| \geq 2\epsilon) \leq 4 \sup_{y \in \{-1, 1\}^2} \mathbb{P}((g(x_1) - g(x_2))^T y \geq \epsilon)$ . Noting that  $V(g(x), y) \leq 4x$  for each  $y \in \{-1, 1\}^2$ , according to Lemma 10 we have, for any  $y \in \{-1, 1\}^2$

$$\mathbb{P}(|(g(\hat{P}_{s,a,s'}^{(k)}) - g(P_{s,a,s'})) y| \geq 2\sqrt{\frac{4P_{s,a,s'}\gamma}{N_{k,s,a}}} + \frac{2\gamma}{N_{k,s,a}}) \leq \delta$$

which means that  $\mathbb{P}(|\hat{P}_{s,a,s'}^{(k)} - P_{s,a,s'}| \geq 2\sqrt{\frac{P_{s,a,s'}\gamma}{N_{k,s,a}}} + \frac{\gamma}{N_{k,s,a}}) \leq 4\delta$ . Suppose that the event  $\{|\hat{P}_{s,a,s'}^{(k)} - P_{s,a,s'}| < 2\sqrt{\frac{P_{s,a,s'}\gamma}{N_{k,s,a}}} + \frac{\gamma}{N_{k,s,a}}\}$  occurs, then we have

$$\begin{aligned} |\hat{P}_{s,a,s'}^{(k)} - P_{s,a,s'}| &\leq 2\sqrt{\frac{P_{s,a,s'}\gamma}{N_{k,s,a}}} + \frac{\gamma}{N_{k,s,a}} \\ &\leq 2\sqrt{\frac{(\hat{P}_{s,a,s'}^{(k)} + 2\sqrt{\frac{\gamma}{N_{k,s,a}}} + \frac{\gamma}{N_{k,s,a}})\gamma}{N_{k,s,a}}} + \frac{\gamma}{N_{k,s,a}} \\ &\leq 2\sqrt{\frac{\hat{P}_{s,a,s'}^{(k)}\gamma}{N_{k,s,a}}} + \frac{3\gamma}{N_{k,s,a}} + \frac{4\gamma^{\frac{3}{4}}}{N_{k,s,a}^{\frac{3}{4}}}. \end{aligned}$$

Therefore,  $\mathbb{P}(B_{2,k}) \leq 4S^2 A\delta$ .

For  $k = 1$ ,  $B_{3,k}^C$  and  $B_{4,k}^C$  holds trivially. For  $k > 1$ , assuming  $\cap_{k' \geq 1} B_{1,k'}^C$ ,  $\cap_{k' \geq 1} B_{2,k'}^C$ ,  $\cap_{1 \leq k' < k} B_{3,k'}^C$  and  $\cap_{1 \leq k' < k} B_{4,k'}^C$  hold. We start to bound  $\mathbb{P}(B_{4,k})$ . Note that  $B_{3,k-1}^C$  ensures that

$$\sum_{1 \leq k' < k} \sum_{s,a} v_{k,s,a} \text{reg}_{s,a} \leq 22HS\sqrt{AT\gamma} \quad (23)$$

Note that if we replace the reward function  $r_{s,a}$  by  $r'_{s,a} = r_{s,a} + \text{reg}_{s,a}$ , the MDP  $M$  will be flat. According to Lemma 1, we have

$$\left| \sum_{i=1}^{c(s,s',\mathcal{L}_{t_k-1})} \sum_{ts_i \leq j \leq te_i-1} (r_{s_j,a_j} + \text{reg}_{s_j,a_j} - \rho^*) - c(s,s',\mathcal{L}_{t_k-1})\delta_{s,s'}^* \right| \leq (\sqrt{2T\gamma} + 1)H \quad (24)$$

with probability  $1 - T\delta$ . Combining (23) and (24), we get that

$$\left| \sum_{i=1}^{c(s,s',\mathcal{L}_{t_k-1})} \sum_{ts_i \leq j \leq te_i-1} (r_{s_j,a_j} - \rho^*) - c(s,s',\mathcal{L}_{t_k-1})\delta_{s,s'}^* \right| \leq (\sqrt{2T\gamma} + 1)H + 22HS\sqrt{AT\gamma} \quad (25)$$

Furthermore,  $B_{3,k}^C$  also implies that  $|\sum_{1 \leq k' < k} \sum_{s,a} v_{k,s,a}(\rho^* - r_{s,a})| \leq 26HS\sqrt{AT\gamma}$ , then it follows  $(\sum_{1 \leq k' < k} l_{k'})|\hat{\rho}_k - \rho^*| \leq 26HS\sqrt{AT\gamma}$  where  $l_{k'}$  is the length of the  $k'$ -th episode and

$\hat{\rho}_k = \frac{\sum_{1 \leq t \leq t_k-1} r_t}{\max\{\sum_{1 \leq k' \leq k} l_{k'}, 1\}}$  is the average reward before the  $k$ -th episode. Therefore, we have that

$$\begin{aligned}
& \left| \sum_{i=1}^{c(s, s', \mathcal{L}_{t_k-1})} \sum_{ts_i \leq j \leq te_i-1} (r_{s_j, a_j} - \hat{\rho}_k) - c(s, s', \mathcal{L}_{t_k-1}) \delta_{s, s'}^* \right| \\
& \leq \left| \sum_{i=1}^{c(s, s', \mathcal{L}_{t_k-1})} \sum_{ts_i \leq j \leq te_i-1} (r_{s_j, a_j} - \rho^*) - c(s, s', \mathcal{L}_{t_k-1}) \delta_{s, s'}^* \right| + \left| \left( \sum_{1 \leq k' < k} l_{k'} \right) (\hat{\rho}_k - \rho^*) \right| \\
& \leq (\sqrt{2T\gamma} + 1)H + 48HS\sqrt{AT\gamma}
\end{aligned} \tag{26}$$

which means that  $h^* \in \mathcal{H}$  in the beginning of the  $k$ -th episode.

The last step is to prove that (5), (6) and (7) hold for  $P'(\pi) = P$  with high probability. (5) holds evidently because of  $B_{2,k}^C$ . According to the  $L_1$  norm concentration inequality [Weissman et al., 2003], we see that  $\mathbb{P}(|P_{s,a} - \hat{P}_{s,a}^{(k)}| \leq \sqrt{\frac{12S\gamma}{N_{k,s,a}}}) \leq \delta$ , thus (6) is satisfied. In order to prove (7) holds for  $P' = P$  with high probability, by using Lemma 10 twice, we have that for each  $(s, a)$

$$\begin{aligned}
|(P_{s,a} - \hat{P}_{s,a}^{(k)})^T h^*| & \leq 2\sqrt{\frac{V(P_{s,a}, h^*)\gamma}{N_{k,s,a}}} + 2\frac{H\gamma}{N_{k,s,a}} \\
& \leq 2\sqrt{\frac{V(\hat{P}_{s,a}^{(k)}, h^*)\gamma}{N_{k,s,a}}} + 2\sqrt{\frac{|V(P_{s,a}, h^*) - V(\hat{P}_{s,a}^{(k)}, h^*)|\gamma}{N_{k,s,a}}} + 2\frac{H\gamma}{N_{k,s,a}} \\
& \leq 2\sqrt{\frac{V(\hat{P}_{s,a}^{(k)}, h^*)\gamma}{N_{k,s,a}}} + 2\sqrt{\frac{H^2(2\sqrt{\frac{\gamma}{N_{k,s,a}}} + 2\frac{\gamma}{N_{k,s,a}})\gamma}{N_{k,s,a}}} + 2\frac{H\gamma}{N_{k,s,a}} \\
& \leq 2\sqrt{\frac{V(\hat{P}_{s,a}^{(k)}, h^*)\gamma}{N_{k,s,a}}} + 12\frac{H\gamma}{N_{k,s,a}} + 10\frac{H\gamma^{3/4}}{N_{k,s,a}^{3/4}}.
\end{aligned}$$

holds with probability  $1 - 2\delta$ . Therefore,  $\mathbb{P}(B_{4,k}^C) \leq (T + 3SA)\delta$ .

On the other side, note that  $\cap_{1 \leq k' < k} B_{4,k'}^C$  ensures that  $\{(\pi^*, P^*, h^*, \rho^*) | \pi^* \in \mathcal{O}\} \cap \mathcal{M}_k \neq \emptyset$ . It means that  $\rho(\pi_k) \geq \rho^*$ . Following the proof of Theorem 2 [Bartlett and Tewari, 2009], we get that when  $T \geq A \log(T)$

$$\begin{aligned}
\sum_{1 \leq t \leq t_k-1} (\rho^* - r_t) & \leq \left| \sum_k v_k^T (P'_k - P_k) \right|_1 H + \left| \sum_k v_k^T (P_k - I) h_k \right| \\
& \leq 2H \left( \sum_{k,s,a} v_{k,s,a} \sqrt{\frac{12S\gamma}{N_{k,s,a}}} + \sqrt{2T\gamma} + K \right) \\
& \leq 18HS\sqrt{AT\gamma}
\end{aligned}$$

with probability  $1 - 2AT\delta$ . Moreover, note that

$$\sum_{1 \leq t \leq t_k-1} \text{reg}_{s_t, a_t} = \sum_{1 \leq t \leq t_k-1} (\rho^* - r_t) + \sum_{1 \leq t \leq t_k-1} (h_{s_t}^* - P_{s_t, a_t}^T h^*) \tag{27}$$

By Azuma's inequality (Lemma 8), we have that

$$\left| \sum_{1 \leq i \leq t} (h_{s_i}^* - P_{s_i, a_i}^T h^*) \right| \leq 2H + \sqrt{2T\gamma}H \tag{28}$$

holds for any  $1 \leq t \leq T$  with probability  $1 - T\delta$ . Assuming (27) and (28) hold for any  $1 \leq t \leq T$ , noticing that  $\text{reg}_{s,a} \geq 0$  for any  $(s, a)$ , we have

$$\left| \sum_{1 \leq t \leq t_k-1} \text{reg}_{s_t, a_t} \right| \leq 18HS\sqrt{AT\gamma} + 2H + \sqrt{2T\gamma}H \leq 22HS\sqrt{AT\gamma}$$

and

$$\left| \sum_{1 \leq t \leq t_k - 1} (\rho^* - r_t) \right| \leq \left| \sum_{1 \leq t \leq t_k - 1} \text{reg}_{s_t, a_t} \right| + \left| \sum_{1 \leq i \leq t} (h_{s_i}^* - P_{s_i, a_i}^T h^*) \right| \leq 26HS\sqrt{AT}\gamma$$

At last, we conclude that when  $\cap_{k' \geq 1} B_{1, k'}^C$ ,  $\cap_{k' \geq 1} B_{2, k'}^C$ ,  $\cap_{1 \leq k' < k} B_{3, k'}^C$  and  $\cap_{1 \leq k' < k} B_{4, k'}^C$  hold,  $\mathbb{P}(B_{3, k}) \leq (2AT + T)\delta$ .

Putting all together we have

$$\mathbb{P}(B) \leq (K + 1)(2AT + 8S^2A + 2T)\delta \leq (6AT + 12S^2A)SA \log(T)\delta$$

when  $T \geq A \log(T)$  and  $SA \geq 4$ .

### C.3 Proof of Lemma 3

**Lemma 14.** Let  $V = \sum_k \sum_{s, a} v_{k, s, a} V(P_{s, a}, h_k)$  and  $W = \sum_k \mathbb{1}_k$ . For any  $C > 0$ , we have

$$\mathbb{P}(|V| \leq C, |W| \geq KH + (4H + 2\sqrt{C})\gamma) \leq 2\delta$$

*Proof.* Let  $X_{k, n} = \sum_{i=1}^n (P_{s_{k, i}, a_{k, i}}^T h_k - h_{k, s_{k, i+1}})$  where  $(s_{k, i}, a_{k, i}, r_{k, i}, s_{k, i+1})$  is the  $i$ -th sample in the  $k$ -th episode. We use  $l_k$  to denote the length of the  $k$ -th episode. Let  $e_n = \max\{k | t_k \leq n\}$  and  $Z_n = \sum_{k=1}^{e_n-1} X_{k, l_k} + X_{e_n, n-t_{e_n}+1}$ . Let  $\mathcal{F}_n = \sigma(Z_1, \dots, Z_n)$ . It's easy to see  $E[Z_{n+1} - Z_n | \mathcal{F}_n] = E[X_{e_n, n+2-t_{e_n}} - X_{e_n, n+1-t_{e_n}} | \mathcal{F}_n] = 0$  if  $e_n = e_{n+1}$ , and  $E[Z_{n+1} - Z_n | \mathcal{F}_n] = E[X_{e_{n+1}, 1} | \mathcal{F}_n] = 0$  otherwise. Therefore,  $\{Z_n\}_{n \geq 1}$  is a martingale with respect to  $\{\mathcal{F}_n\}_{n \geq 1}$ . On the other hand, it's easy to see  $|Z_{n+1} - Z_n| \leq H$ . We then apply Lemma 11 to  $\{Z_n\}_{n \geq 1}$  with  $n = T$ ,  $nx = (2\sqrt{C} + 4H)\gamma$  and  $ny = C$ , and obtain that

$$\mathbb{P}(Z_T \geq 2\sqrt{C}\gamma + 4H\gamma, |V| \leq C) \leq \delta$$

At last, because  $|W - Z_T| = |\sum_k -h_{k, s_1} + h_{k, s_{l_k+1}}| \leq KH$ , we conclude that,

$$\mathbb{P}(|V| \leq C, |W| \geq KH + (4H + 2\sqrt{C})\gamma) \leq 2\delta.$$

□

Note that  $\mathbb{1}_k = v_k^T (P_k - I)^T h_k = \sum_{i=1}^n (P_{s_i, a_i}^T h_k - h_{k, s_{i+1}}) = \sum_{i=1}^{l_k} (P_{s_i, a_i}^T h_k - h_{k, s_{i+1}}) - h_{k, s_1} + h_{k, s_{l_k+1}}$ . Let  $X_n = \sum_{i=1}^n (P_{s_i, a_i}^T h_k - h_{k, s_{i+1}})$ . Now it suffices to show that  $\sum_k \sum_{s, a} v_{k, s, a} V(P_{s, a}, h_k) = O(TH)$  w.h.p.. Let  $x^2$  denote the vector  $[x_1^2, \dots, x_S^2]^T$  for  $x = [x_1, \dots, x_S]^T$ . Note that

$$\begin{aligned} \sum_k \sum_{s, a} v_{k, s, a} V(P_{s, a}, h_k) &= \sum_k \sum_{s, a} v_{k, s, a} (P_{s, a}^T h_k^2 - ((P'_{k, s, a})^T h_k)^2) \\ &\quad + \sum_k \sum_{s, a} v_{k, s, a} (P'_{k, s, a} - P_{s, a})^T h_k (P'_{k, s, a} + P_{s, a})^T h_k. \end{aligned} \quad (29)$$

By the definition of  $h_k$ , we have that  $(P'_{k, s, a})^T h_k - h_{k, s} = \rho_k - r_{s, a}$ . Then we obtain that,

$$\begin{aligned} \left| \sum_{k, s, a} v_{k, s, a} (P_{s, a}^T h_k^2 - ((P'_{k, s, a})^T h_k)^2) \right| &= \left| \sum_{k, s, a} v_{k, s, a} (P_{s, a}^T h_k^2) - h_{k, s}^2 \right| + \left| \sum_{k, s, a} h_{k, s}^2 - (h_{k, s} + \rho_k - r_{s, a})^2 \right| \\ &\leq \left| \sum_{k, s, a} v_{k, s, a} (P_{s, a}^T h_k^2) - h_{k, s}^2 \right| + \left| \sum_{k, s, a} (\rho_k - r_{s, a})(2h_{k, s} + \rho_k - r_{s, a}) \right| \\ &\leq \sum_{k, s, a} v_{k, s, a} (P_{s, a}^T h_k^2 - h_{k, s}^2) + \sum_{k, s, a} v_{k, s, a} (2H + 1) \end{aligned} \quad (30)$$

According to Lemma 8, we have that, with probability  $1 - \delta$

$$\sum_{k, s, a} v_{k, s, a} (P_{s, a}^T h_k^2 - h_{k, s}^2) \leq \sqrt{2T}\gamma H^2 + KH^2 \quad (31)$$

Combining (30) and (31), we have that, with probability  $1 - \delta$ , it holds that

$$\left| \sum_{k,s,a} v_{k,s,a} (P_{s,a}^T h_k^2 - ((P'_{k,s,a})^T h_k)^2) \right| \leq \sqrt{2T\gamma} H^2 + KH^2 + T(2H + 1) \quad (32)$$

Assuming the good event  $G$  occurs, the second term in (29) can be bounded by  $4H^2 \sum_{k,s,a} v_{k,s,a} \sqrt{\frac{S\gamma}{N_{k,s,a}}}$ . Combining this with (32), we obtain that, with probability  $1 - \delta$ , it holds that

$$\sum_k \sum_{s,a} v_{k,s,a} V(P_{s,a}, h_k) \leq \sqrt{2T\gamma} H^2 + KH^2 + T(2H + 1) + 4\sqrt{2} H^2 S \sqrt{AT\gamma} \quad (33)$$

The dominant term is the right hand side of (33) is  $2TH$  when  $T$  is large enough. Specifically, when  $T \geq S^2 AH^2 \gamma$ , we have  $\sum_k \sum_{s,a} v_{k,s,a} V(P_{s,a}, h_k) \leq 12TH$ .

Let  $C = 12TH$  in Lemma 14, then it follows that

$$\begin{aligned} \mathbb{P}(|\sum_k \mathbb{1}_k| \geq KH + (4H + 2\sqrt{12TH})\gamma) &\leq \mathbb{P}(\sum_k \sum_{s,a} v_{k,s,a} V(P_{s,a}, h_k) \geq 12TH) + \\ &\mathbb{P}(\sum_k \sum_{s,a} v_{k,s,a} V(P_{s,a}, h_k) \leq 12TH, |\sum_k \mathbb{1}_k| \geq KH + (4H + 2\sqrt{12TH})\gamma) \\ &\leq 3\delta. \end{aligned}$$

#### C.4 Proof of Lemma 4

**Lemma 15.** When  $T \geq H^2 S^2 A \gamma$ , with probability  $1 - \delta$ , it holds that  $\sum_{s,a} N_{s,a}^{(T)} V(P_{s,a}, h^*) \leq 49TH$

*Proof.* Noting that  $P_{s,a}^T h^* = h_s^* + \rho^* - r_{s,a} - \text{reg}_{s,a}$ , we have

$$\begin{aligned} \sum_{s,a} N_{s,a}^{(T)} V(P_{s,a}, h^*) &= \sum_{s,a} N_{s,a}^{(T)} (P_{s,a}^T h^{*2} - (P_{s,a}^T h^*)^2) \\ &= \sum_{s,a} N_{s,a}^{(T)} (P_{s,a}^T h^{*2} - h_s^{*2}) + \sum_{s,a} N_{s,a}^{(T)} (\text{reg}_{s,a} + r_{s,a} - \rho^*) (P_{s,a}^T h^* + h_s^*) \\ &\leq \sqrt{2T\gamma} H^2 + KH^2 + 2H \sum_{s,a} N_{s,a}^{(T)} \text{reg}_{s,a} + 2TH \end{aligned} \quad (34)$$

with probability  $1 - \delta$ . By definition of  $B_{3,K+1}^C$ , we have  $\sum_{s,a} N_{s,a}^{(T)} \text{reg}_{s,a} \leq 22HS\sqrt{AT\gamma}$ . By combining this inequality with (34), when  $T \geq H^2 S^2 A \gamma$ , we have

$$\sum_{s,a} N_{s,a}^{(T)} V(P_{s,a}, h^*) \leq 2TH + H^2(44S\sqrt{AT\gamma} + \sqrt{2T\gamma} + K) \leq 49TH$$

holds with probability  $1 - \delta$ . □

Assuming (34) holds, we have that

$$\begin{aligned} \sum_{k,s,a} v_{k,s,a} \sqrt{\frac{V(P_{s,a}, h^*)\gamma}{N_{k,s,a}}} &= \sum_{s,a} \sqrt{V(P_{s,a}, h^*)\gamma} \sum_k v_{k,s,a} \sqrt{\frac{1}{N_{k,s,a}}} \\ &\leq 2\sqrt{2} \sum_{s,a} \sqrt{N_{s,a}^{(T)} V(P_{s,a}, h^*)\gamma} \\ &\leq 2\sqrt{2SA\gamma} \sqrt{\sum_{s,a} N_{s,a}^{(T)} V(P_{s,a}, h^*)} \\ &\leq 21\sqrt{SAHT\gamma}. \end{aligned} \quad (35)$$

Here the first inequality is by Lemma 13 with  $\alpha = \frac{1}{2}$ , the second inequality is Jensen's inequality and (34) implies the last inequality. Obviously, Lemma 4 follows by Lemma 15.



### C.5 Proof of Lemma 5

Note that if we replace the reward  $r_{s,a}$  by  $r_{s,a} + \text{reg}_{s,a}$ , then the MDP  $M$  would be a *flat* MDP. According to Lemma 1, we have that, with probability  $1 - S^2 T \delta$ , for any  $t \leq T$  and two different states  $s, s'$ , it holds that

$$\left| \sum_{k=1}^{c(s,s',\mathcal{L}_{t_k})} \sum_{ts_k \leq i \leq te_k(\mathcal{L})-1} (r_i + \text{reg}_{s_i,a_i} - \rho^*) - c(s,s',\mathcal{L}_{t_k}) \delta_{s,s'}^* \right| \leq (\sqrt{2T\gamma} + 1)H$$

At the same time,  $B_{4,k}^C$  implies (26) is true for  $t = t_k$ . Then we have

$$\left| \sum_{k=1}^{c(s,s',\mathcal{L}_{t_k})} \sum_{ts_k \leq i \leq te_k(\mathcal{L})-1} (r_i - \hat{\rho}_k) - c(s,s',\mathcal{L}_{t_k}) \delta_{k,s,s'} \right| \leq (\sqrt{2T\gamma} + 1)H + 48HS\sqrt{AT\gamma}$$

Because  $B_{3,k}^C$  occurs,  $(t_k - 1)|\rho^* - \hat{\rho}_k| \leq 26HS\sqrt{AT\gamma}$  and  $\sum_{1 \leq k' < k} \text{reg}_{s_{k'},a_{k'}} \leq 22HS\sqrt{AT\gamma}$ . Let  $N_{k,s,a,s'} = \sum_{1 \leq t \leq t_k-1} I[s_t = s, a_t = a, s_{t+1} = s']$ . Because  $|a-b| \leq |a+c| + |b+d| + |c| + |d|$ , by letting

$$\begin{aligned} a &= \sum_{k=1}^{c(s,s',\mathcal{L}_{t_k})} \sum_{ts_k \leq i \leq te_k(\mathcal{L})-1} (r_i - \rho^*) - c(s,s',\mathcal{L}_{t_k}) \delta_{s,s'}^*, \\ b &= \sum_{k=1}^{c(s,s',\mathcal{L}_{t_k})} \sum_{ts_k \leq i \leq te_k(\mathcal{L})-1} (r_i - \rho^*) - c(s,s',\mathcal{L}_{t_k}) \delta_{k,s,s'}, \\ c &= \sum_{k=1}^{c(s,s',\mathcal{L}_{t_k})} \sum_{ts_k \leq i \leq te_k(\mathcal{L})-1} \text{reg}_{s_i,a_i}, \quad d = \sum_{k=1}^{c(s,s',\mathcal{L}_{t_k})} \sum_{ts_k \leq i \leq te_k(\mathcal{L})-1} (\rho^* - \hat{\rho}_k), \end{aligned}$$

we have that

$$|N_{k,s,a,s'}(\delta_{k,s,s'} - \delta_{s,s'}^*)| \leq |c(s,s',\mathcal{L}_{t_k})(\delta_{k,s,s'} - \delta_{s,s'}^*)| \leq 2(\sqrt{2T\gamma} + 1)H + 96HS\sqrt{AT\gamma}$$

and

$$\begin{aligned} & \sum_k \sum_{s,a} v_{k,s,a} \sum_{s'} \sqrt{\frac{\hat{P}_{s,a,s'}^{(k)} |(\delta_{k,s,s'} - \delta_{s,s'}^*)|}{N_{k,s,a}}} \\ &= \sum_{k,s,a} \frac{v_{k,s,a}}{N_{k,s,a}} \sum_{s'} \sqrt{N_{k,s,a,s'} |(\delta_{k,s,s'} - \delta_{s,s'}^*)|} \\ &\leq KS^2 \sqrt{2(\sqrt{2T\gamma} + 1)H + 96HS\sqrt{AT\gamma}} \\ &\leq 11KS^{\frac{5}{2}} A^{\frac{1}{4}} H^{\frac{1}{2}} T^{\frac{1}{4}} \gamma^{\frac{1}{4}}, \end{aligned} \tag{36}$$

where the first inequality holds because  $\sum_{k,s,a} \frac{v_{k,s,a}}{N_{k,s,a}} \leq \sum_{k,s,a} \mathbb{I}[\pi_k(s) = a] \leq KS$ .

### C.6 Detailed Proof of Theorem 1

According to Lemma 2, the probability of bad event is bounded by  $(6AT + 12S^2 A)SA \log(T)$  when  $T \geq A \log(T)$  and  $SA \geq 4$ . We then consider to bound the regret when the good event occurs. We present more rigorous analysis compared to the proof sketch in Section 5.2. Recall that

$$\begin{aligned} \mathcal{R}_k &= v_k^T(\rho^* \mathbf{1} - r_k) \leq v_k^T(\rho_k \mathbf{1} - r_k) = v_k^T(P'_k - I)^T h_k \\ &= \underbrace{v_k^T(P_k - I)^T h_k}_{\textcircled{1}_k} + \underbrace{v_k^T(\hat{P}_k - P_k)^T h^*}_{\textcircled{2}_k} + \underbrace{v_k^T(P'_k - \hat{P}_k)^T h_k}_{\textcircled{3}_k} + \underbrace{v_k^T(\hat{P}_k - P_k)^T (h_k - h^*)}_{\textcircled{4}_k}; \end{aligned}$$

$$\textcircled{2}_k \leq \sum_{s,a} v_{k,s,a} \left( 2\sqrt{\frac{V(P_{s,a}, h^*)\gamma}{N_{k,s,a}}} + 2\frac{H\gamma}{N_{k,s,a}} \right), \tag{37}$$

$$\sqrt{V(\hat{P}_{s,a}^{(k)}, h_k)} - \sqrt{V(P_{s,a}, h^*)} \leq \sum_{s'} \sqrt{4H\hat{P}_{s,a,s'}^{(k)}|\delta_{k,s,s'} - \delta_{s,s'}^*|} + \sqrt{4H^2 \frac{14S\gamma}{N_{k,s,a}}}. \quad (38)$$

Plugging (38) into (11), we get that

$$\begin{aligned} \textcircled{3}_k &\leq \sum_{s,a} v_{k,s,a} L_2(N_{k,s,a}, \hat{P}_{s,a}^{(k)}, h_k) = \sum_{s,a} v_{k,s,a} \left( 2\sqrt{\frac{V(\hat{P}_{s,a}^{(k)}, h_k)\gamma}{N_{k,s,a}}} + 12\frac{H\gamma}{N_{k,s,a}} + 10\frac{H\gamma^{3/4}}{N_{k,s,a}^{3/4}} \right) \\ &\leq \sum_{s,a} v_{k,s,a} \left( 2\sqrt{\frac{V(P_{s,a}, h^*)\gamma}{N_{k,s,a}}} + 4\sum_{s'} \sqrt{\frac{H\hat{P}_{s,a,s'}^{(k)}|\delta_{k,s,s'} - \delta_{s,s'}^*|\gamma}{N_{k,s,a}}} + \frac{8HS^{\frac{1}{4}}\gamma^{3/4}}{N_{k,s,a}^{3/4}} + 12\frac{H\gamma}{N_{k,s,a}} + 10\frac{H\gamma^{3/4}}{N_{k,s,a}^{3/4}} \right). \end{aligned} \quad (39)$$

Based on (14),  $B_{2,k}^C$  and the fact  $|\delta_{k,s,s'} - \delta_{s,s'}^*| \leq 2H$ , we have that

$$\begin{aligned} \textcircled{4}_k &= \sum_{s,a} v_{k,s,a} (\hat{P}_{s,a}^{(k)} - P_{s,a})^T (h_k - h_{k,s}\mathbf{1} - h^* + h_s^*\mathbf{1}) = \sum_{s,a} v_{k,s,a} \sum_{s'} (\hat{P}_{s,a,s'}^{(k)} - P_{s,a,s'}) (\delta_{s,s'}^* - \delta_{k,s,s'}) \\ &\leq \sum_{s,a} v_{k,s,a} \sum_{s'} \left( 2\sqrt{\frac{\hat{P}_{s,a,s'}^{(k)}\gamma}{N_{k,s,a}}} + \frac{3\gamma}{N_{k,s,a}} + \frac{4\gamma^{3/4}}{N_{k,s,a}^{3/4}} \right) |\delta_{k,s,s'} - \delta_{s,s'}^*| \\ &\leq 2 \sum_{k,s,a} v_{k,s,a} \left( \sum_{s'} \sqrt{\frac{2H\hat{P}_{s,a,s'}^{(k)}|\delta_{k,s,s'} - \delta_{s,s'}^*|\gamma}{N_{k,s,a}}} + \frac{6SH\gamma}{N_{k,s,a}} + \frac{8SH\gamma^{3/4}}{N_{k,s,a}^{3/4}} \right) \end{aligned} \quad (40)$$

Taking sum of RHS of (37), (39) and (40), based on the fact  $S \geq 1$  we obtain that

$$\textcircled{2}_k + \textcircled{3}_k + \textcircled{4}_k \leq \sum_{s,a} v_{k,s,a} \left( 4\sqrt{\frac{V(P_{s,a}, h^*)\gamma}{N_{k,s,a}}} + 20\frac{SH\gamma}{N_{k,s,a}} + 7\sum_{s'} \sqrt{\frac{H\hat{P}_{s,a,s'}^{(k)}|\delta_{k,s,s'} - \delta_{s,s'}^*|\gamma}{N_{k,s,a}}} + 26\frac{SH\gamma^{3/4}}{N_{k,s,a}^{3/4}} \right) \quad (41)$$

According to (9), (41) Lemma 4, Lemma 5 and Lemma 13, we obtain that when  $T \geq S^3 AH^2 \gamma$  and  $SA \geq 4$ , with probability at least  $1 - 20S^3 A^2 T \log(T) \delta$ , it holds that

$$\begin{aligned} \mathcal{R}(T) &= \sum_k \mathcal{R}_k \leq KH + (4H + 2\sqrt{TH})\gamma \\ &\quad + \sum_{k,s,a} v_{k,s,a} \left( 4\sqrt{\frac{V(P_{s,a}, h^*)\gamma}{N_{k,s,a}}} + 20\frac{SH\gamma}{N_{k,s,a}} + 7\sum_{s'} \sqrt{\frac{H\hat{P}_{s,a,s'}^{(k)}|\delta_{k,s,s'} - \delta_{s,s'}^*|\gamma}{N_{k,s,a}}} + 26\frac{SH\gamma^{3/4}}{N_{k,s,a}^{3/4}} \right) \\ &\leq KH + (4H + 2\sqrt{TH})\gamma + 84\sqrt{SAHT}\gamma + 77KS^{\frac{5}{2}}A^{\frac{1}{4}}HT^{\frac{1}{4}}\gamma^{\frac{3}{4}} \\ &\quad + 20SH\gamma(1 + 2SA \log(T)) + 208S^{\frac{7}{4}}A^{\frac{3}{4}}T^{\frac{1}{4}}H\gamma^{\frac{3}{4}} = \tilde{O}(\sqrt{SATH}). \end{aligned} \quad (42)$$

Let  $\delta_1 = 20S^3 A^2 T \log(T) \delta$ . When  $T \geq \{S^{12} A^3 H^2, H^2 SA \kappa, HSA \log(T)^2 \kappa, H^2 S^2 \log(T) \kappa\}$  where  $\kappa = \log(\frac{40S^3 A^2 T \log(T)}{\delta_1})$ , with probability  $1 - \delta_1$ , we have that

$$\mathcal{R}(T) \leq 490\sqrt{SATH \log(\frac{40S^2 A^2 T \log(T)}{\delta_1})}.$$

**The selection of  $p_1$ :** Let  $p_1(S, A, H, \log(\frac{1}{\delta})) = 64 \log(\frac{1}{\delta})^2 (S^4 A^4 H^6 + S^4 A^4 H^4 + S^6 A^2 H^6) + S^{12} A^3 H^3 + 100$ . When  $T \geq p_1(S, A, H, \log(\frac{1}{\delta}))$  and  $S, A \geq 20$ , we have that  $T \geq S^{12} A^3 H^3$  and  $\frac{T}{\log^3(T)} \geq \sqrt{T} \geq 8 \log(\frac{1}{\delta}) \max\{S^2 A^2 H^3, S^3 A H^3\} \geq \frac{1}{\log(T)} \max\{H^2 SA \kappa, HSA \log(T)^2 \kappa, H^2 S^2 \log(T) \kappa\}$ , since  $8SA \geq \frac{\kappa}{\log(\frac{1}{\delta}) \log(T)}$ . Therefore,  $T \geq \max\{S^{12} A^3 H^2, H^2 SA \kappa, HSA \log(T)^2 \kappa, H^2 S^2 \log(T) \kappa\}$ .

## D Proof of Corollary 1

In this section we consider to learn MDPs with finite diameter. According to Theorem 1, in order to reach an  $\tilde{O}(\sqrt{DSAT})$  upper bound for the regret, it suffices to provide a real number  $H$  such that  $sp(h^*) \leq H \leq D$  within  $o(\sqrt{T})$  steps. For a transition model  $P$ , we use  $P^{(x,y)}$  to denote the transition model satisfying that  $P_{s,a}^{(x,y)} = P_{s,a}$  when  $s \neq x$ , and  $P_{s,a}^{(x,y)} = \mathbf{1}_y$ <sup>6</sup> when  $s = x$ ,  $\forall a$ . Let  $D_{xy} = \min_{\pi: S \rightarrow \Delta_A} T_{x \rightarrow y}^\pi$ , then we try to learn  $D_{xy}$  directly.

In Algorithm 3, when we start from  $x$ , we target to reach  $y$  as soon as possible by employing a UCRL2-like algorithm. Once we reach  $y$ , we change the target to achieve  $x$ . Let  $mdp(P, r)$  denote the MDP with transition model  $P$  and reward function  $r$ . We maintain the two learning process separately, so they are corresponding to running two independent learning processes, which learn  $mdp(P^{(y,x)}, \mathbf{1}_y)$  and  $mdp(P^{(x,y)}, \mathbf{1}_x)$  respectively. Based on Algorithm 3, we can get a close approximation for  $D_{xy}$  within  $T^{\frac{1}{4}}$  steps. Without loss of generality, we assume  $T^{\frac{1}{4}}$  is an integer.

**Lemma 16.** *When  $T \geq (136D^3S\sqrt{A}\gamma)^8$ , for any  $x \neq y \in S$ , let  $(\hat{D}_{xy}, \hat{D}_{yx})$  be the output of Algorithm 3 with  $(T^{1/4}, \delta, x, y)$  as the input, then with probability  $1 - 8SAT^{\frac{1}{2}}\delta$ , it holds that  $|\hat{D}_{xy} - D_{xy}| \leq 1$  and  $|\hat{D}_{yx} - D_{yx}| \leq 1$ .*

**Proof of Corollary 1.** Obviously, an MDP with finite diameter is weak-communicating. We run Algorithm 3 for all  $s \neq s'$  with  $T_0 = T^{1/4}$  and  $\delta_0 = \delta$  (without loss of generality, we assume that  $T^{\frac{1}{4}}$  is an integer). Denote the output of Algorithm 3 with input  $(T^{1/4}, \delta, s, s')$  as  $(\hat{D}_{ss'}, \hat{D}_{s's})$ . Let  $\hat{H} = \max_{s, s'} \hat{D}_{ss'} + 1$ . According to Lemma 16,  $sp(h^*) \leq \max_{s, s'} D_{ss'} \leq \hat{H} \leq D + 2$  with probability  $1 - 8S^3AT^{\frac{1}{2}}\delta$ . We then execute Algorithm 1 with  $H = \hat{H}$  for  $T - S(S-1)T^{\frac{1}{4}}$  steps. Since the total number of time steps for performing Algorithm 3 is at most  $S^2T^{\frac{1}{4}}$ , the regret in the first stage is at most  $S^2T^{\frac{1}{4}}$ . According to Theorem 1, when  $T \geq 2 \max\{(136D^3S\sqrt{A}\kappa)^8, S^{12}A^3D^2, DSALog^2(T)\kappa, D^2SA\kappa, D^2S^2\log(T)\kappa\}$  where  $\kappa = \log(\frac{44S^2A^2T\log(T)}{\delta_1})$ , the regret can be bounded as

$$\mathcal{R}(T) \leq 491\sqrt{SATD(\log(\frac{S^3A^2T\log(T)}{\delta}))}.$$

,with probability  $1 - \delta$ , the regret is at most  $491\sqrt{SATD\log(\frac{44S^2A^2T\log(T)}{\delta_1})}$ .  $\square$

**The selection of  $p_2$ :** Let  $p_2(S, A, D, \log(\frac{1}{\delta})) = 4(136D^3S\sqrt{A})^{16}(8SA)^8 + \log(\frac{1}{\delta})^8 10^{16}$ . When  $T \geq p_2(S, A, D, \log(\frac{1}{\delta}))$  and  $S, A, D \geq 20$ ,  $\frac{T}{\log(\frac{1}{\delta})^4 \log(T)^4} \geq \sqrt{T} \geq 2(136D^3S\sqrt{A})^8(8SA)^4 \geq \frac{2(136D^3S\sqrt{A}\kappa)^8}{\log(\frac{1}{\delta})^4 \log(T)^4}$ , since  $8SA \geq \frac{\kappa}{\log(\frac{1}{\delta}) \log(T)}$ . Therefore,  $T \geq \max\{2(136D^3S\sqrt{A}\kappa)^8, 2(D^3S\sqrt{A})^{16}\} = 2 \max\{(136D^3S\sqrt{A}\kappa)^8, S^{12}A^3D^2, DSALog^2(T)\kappa, D^2SA\kappa, D^2S^2\log(T)\kappa\}$ .

### D.1 Proof of Lemma 16

In Algorithm 3, we maintain two learning process. We use  $I_{x,y}(t)$  to indicate whether the  $t$ -th step is contained by the first process. For  $t \geq T_0 + 1$ , we set  $I_{x,y}(t) = 0$ . Let  $M_1$  be the MDP with transition probability  $P^{(x,y)}$  and reward  $\mathbf{1}_y$ , and  $h^{(1)}, \rho^{(1)}$  denote the optimal bias function and the optimal average reward of  $M_1$  respectively. In the same way we define  $M_2, h^{(2)}$  and  $\rho^{(2)}$  according to transition probability  $P^{(y,x)}$  and reward  $\mathbf{1}_x$ .

For the first process, the regret  $\mathcal{R}^{(1)} = \sum_{1 \leq t \leq T_0, I_{x,y}(t)=1} \rho^{(1)} + \sum_{1 \leq t \leq T_0, s_{t+1}=y, I_{x,y}(t)=1} (\rho^{(1)} - 1) = (t^{(1)} + k^{(1)})\rho^{(1)} - k^{(1)}$ , where  $t^{(1)} = \sum_{1 \leq t \leq T_0} I_{x,y}(t)$  and  $k^{(1)} = |\{t \leq T_0 | s_{t+1} = y, I_{x,y}(t) = 1\}|$ . We aim to prove that with probability  $1 - p$  for some  $p \in (0, 1)$ , it holds that

$$|\mathcal{R}_1| \leq 34DS\sqrt{AT_0\gamma}. \quad (43)$$

<sup>6</sup>We use  $\mathbf{1}_y$  to denote the vector  $v$  satisfying  $v_s = I[s = y], \forall s$ .

Because  $\rho^{(1)} = \frac{1}{D_{xy}+1}$ , assuming (43) holds, we have  $|\frac{t^{(1)}}{k^{(1)}} - D_{xy}| \leq \frac{68D^2S\sqrt{AT_0\gamma}}{k^{(1)}}$ . On the other side, we define  $t^{(2)} = \sum_{1 \leq t \leq T_0} (1 - I_{x,y}(t))$ ,  $k^{(2)} = |\{t \leq T_0 | s_{t+1} = x, I_{x,y}(t) = 0\}|$ , and thus  $\mathcal{R}_2 = (t^{(2)} + k^{(2)})\rho^{(2)} - k^{(2)}$ . Assuming

$$|\mathcal{R}_2| \leq 34DS\sqrt{AT_0\gamma} \quad (44)$$

holds, it follows that  $|\frac{t^{(2)}}{k^{(2)}} - D_{yx}| \leq \frac{68D^2S\sqrt{AT_0\gamma}}{k^{(2)}}$ . Noticing that  $|k^{(1)} - k^{(2)}| \leq 1$  and  $t^{(1)} + t^{(2)} = T_0$ , we derive that  $k^{(1)} \geq \frac{T_0}{2D}$  and  $k^{(2)} \geq \frac{T_0}{2D}$ . Therefore, we get that

$$\begin{aligned} |\frac{t^{(1)}}{k^{(1)}} - D_{xy}| &\leq \frac{68D^2S\sqrt{AT_0\gamma}}{k^{(1)}} \leq \frac{136D^3S\sqrt{A\gamma}}{\sqrt{T_0}} \\ |\frac{t^{(2)}}{k^{(2)}} - D_{yx}| &\leq \frac{68D^2S\sqrt{AT_0\gamma}}{k^{(2)}} \leq \frac{136D^3S\sqrt{A\gamma}}{\sqrt{T_0}}. \end{aligned}$$

Because  $\sqrt{T_0} \geq 136D^3S\sqrt{A\gamma}$ , we conclude that  $|\frac{t^{(1)}}{k^{(1)}} - D_{xy}| \leq 1$  and  $|\frac{t^{(2)}}{k^{(2)}} - D_{yx}| \leq 1$  with probability  $1 - 2p$ .

Theorem2 in [Jaksch et al., 2010] provides a solid foundation to prove (43) holds with high probability. Following the analysis of this theorem, we have some lemmas below.

**Lemma 17.** *Let  $X_1, X_2, \dots$  be i.i.d. discrete random variables with support  $\mathcal{X}$ . Let  $I_n \in \{0, 1\}$  be random variables in  $\{0, 1\}$  for  $n = 1, 2, \dots$ . Assume that for each  $n$ ,  $X_n$  is independent of  $\{I_1, \dots, I_n\}$ . Let  $a_k = \min\{i \geq 1 | \sum_{j=1}^i I_j \geq k\}$ . For any  $k \geq 1$ , if  $a_k < \infty$  with probability 1, then the joint distribution of  $(X_{a_1}, \dots, X_{a_k})$  is the same as the joint distribution of  $(X_1, \dots, X_k)$ , which means  $X_{a_1}, \dots, X_{a_k}$  are i.i.d. random variables.*

*Proof.* When  $k = 1$ , for each  $i \geq 1$ , conditioning on  $a_1 = i$ , the distribution of  $X_{a_k}$  is the same as the distribution of  $X_1$ , since  $X_i$  is independent of  $(X_1, \dots, X_{i-1}, I_1, \dots, I_i)$ . Because  $a_k < \infty$  with probability 1, then we have  $\mathbb{P}(X_{a_k} = x) = \sum_{i=1}^{\infty} \mathbb{P}(a_k = i) \mathbb{P}(X_1 = x) = \mathbb{P}(X_1 = x)$  for any  $x \in \mathcal{X}$ . For  $n \geq 2$ , we assume that this lemma holds for  $k = n - 1$ . In the same way we have that for any  $x \in \mathcal{X}$ ,  $\mathbb{P}(X_{a_n} = x | a_1, a_2, \dots, a_n, X_1, \dots, X_{a_{n-1}}) = \mathbb{P}(X_1 = x)$ . It then follows that for any  $(x_1, \dots, x_n) \in \mathcal{X}^n$ ,  $\mathbb{P}(X_{a_1} = x_1, \dots, X_{a_n} = x_n) = \mathbb{P}(X_{a_1} = x_1, \dots, X_{a_{n-1}} = x_{n-1}) \mathbb{P}(X_{a_n} = x_n | X_{a_1} = x_1, \dots, X_{a_{n-1}} = x_{n-1}) = \mathbb{P}(X_{a_1} = x_1, \dots, X_{a_{n-1}} = x_{n-1}) \mathbb{P}(X_1 = x_n) = \prod_{i=1}^n \mathbb{P}(X_1 = x_i)$ . Then the conclusion follows by induction.  $\square$

**Lemma 18.** *With probability  $1 - \frac{\delta}{60T_0^6}$ , in any episode, the true transition probability  $P$  is in  $\mathcal{P}$ .*

*Proof.* Because the rewards  $\{r_{s,a}\}_{s \in \mathcal{S}, a \in \mathcal{A}}$  are assumed to be known in the beginning, it suffices to make sure  $|P_{s,a} - \hat{P}_{s,a}^{(1)}| \leq \sqrt{\frac{14SA \log(2AT_0/\delta_0)}{\max\{N_{s,a}^{(1)}(t), 1\}}}$ .

To apply Lemma 17, we have to make sure  $a_k \leq \infty$  with probability 1 for  $\forall k \leq T_0$ . But it's easy to see that, if we let  $I_n = I_{x,y}(t(n, s, a))$  for  $n \leq T_0$  where  $t(n, s, a)$  is the first time  $(s, a)$  is visited for  $n$  times (if the visit number of  $(s, a)$  is less than  $n$ , we set  $t(n, s, a) = T_0 + 1$  and  $I_n = I_{x,y}(T_0 + 1) = 0$ ). For  $T_0 + 1 \leq n \leq 2T_0$ , we set  $I_n = 1$ , then it follows  $a_k \leq 2T_0$  for  $\forall k \leq T_0$ . Note that  $I_{x,y}(t)$  is a function of the random events before the  $t$ -th round, and thus  $I_{x,y}(t)$  is obviously independent of subsequent states  $(s_{t+1}, s_{t+2}, \dots)$ . When  $n \geq T_0 + 1$ ,  $I_n$  is independent of all other random variables. As a result, for any  $k \leq T_0$ , the conclusion of Lemma 17 holds for  $\hat{P}_{s,a,1}, \hat{P}_{s,a,2}, \dots$  and  $I_1, I_2, \dots$ , where  $\hat{P}_{s,a,i} \in \mathbb{R}^S$  is the result of the  $i$ -th try of executing  $a$  in  $s$ .

Because  $N_{s,a}^{(1)}(t) \leq T_0$ , according to Lemma 17 the distribution of  $\hat{P}_{s,a}^{(1)}(t)$  is the same as the distribution of  $\frac{1}{N_{s,a}^{(1)}(t)} \sum_{i=1}^{N_{s,a}^{(1)}(t)} P_{s,a,i}$ , where  $P_{s,a,1}, P_{s,a,2}, \dots$  are i.i.d. distributed obeying multinomial distribution with parameter  $P_{s,\cdot}$ . Based on the analysis in Lemma 17 [Jaksch et al., 2010], we conclude that with probability  $1 - \frac{\delta}{60T_0^6}$ , for any  $t \leq T_0$  and any  $(s, a)$ , it holds that

$$|P_{s,a} - \hat{P}_{s,a}^{(1)}(t)| \leq \sqrt{\frac{14SA \log(2AT_0/\delta_0)}{\max\{N_{s,a}^{(1)}(t), 1\}}}$$

$\square$

**Lemma 19.** Let  $P'_k$  denote the transition model of the optimal extended MDP in the  $k$ -th episode, and  $u_k$  denote the optimal bias function of  $\text{mdp}(P'_k, \mathbf{1}_y)$ . Then we have  $sp(u_k) \leq D_y := \sup_{z \neq y} D_{zy}$ .

*Proof.* Firstly, it's easy to see that  $u_{k,y} \geq u_{k,z}$  for any  $z \in \mathcal{S}$ . Assume that there exists  $z$  such that  $u_{k,y} - u_{k,z} > D_y \geq D_{zy}$ . We can design a nonstationary policy to achieve better value for  $u_{k,z}$ : in the first, we start from  $z$  following some policy to reach  $y$  as quickly as possible. Because the true transition model  $P \in \mathcal{P}$  in each episode, we can reach  $y$  within  $D_{zy}$  steps in expectation. After reaching  $y$ , we follow the original optimal policy. Let  $R_t(s)$  be the optimal  $t$ -step accumulative reward starting from  $s$  and  $\rho$  be the corresponding optimal average reward. According to the definition of optimal bias function, we have  $\lim_{t \rightarrow \infty} R_t(z) - \rho t = u_{k,z} \geq \lim_{t \rightarrow \infty} R_{t-D_{zy}}(y) - \rho t \geq u_{k,y} - D_{zy}$ . Therefore,  $sp(u_k) \leq \max_z \{u_{k,y} - u_{k,z}\} \leq D_{zy}$ .  $\square$

According to the derivation in Section 4 [Jaksch et al., 2010], we have that

$$\begin{aligned} \mathcal{R}(\text{mdp}(P^{(x,y)}, \mathbf{1}_y), T_0) &\leq \left| \sum_k v_k^T (P'_k - I)^T u_k \right| \leq \left| \sum_k v_k^T (P_k - I)^T u_k \right| + \left| \sum_k v_k^T (P'_k - P_k) u_k \right| \\ &\leq D \sqrt{\frac{5}{2} T \log\left(\frac{8T_0}{\delta_0}\right)} + DSA \log_2\left(\frac{8T}{SA}\right) + (2D \sqrt{14S \log\left(\frac{2AT_0}{\delta_0}\right)} + 2)(\sqrt{2} + 1)\sqrt{T} \end{aligned} \quad (45)$$

holds with probability  $1 - 2T_0 \frac{\delta}{12T_0^{5/4}} - \frac{\delta}{60T_0^6}$ .

**Remark:** We can prove (45) holds with high probability for all  $t \leq T_0$  in the same way. As a result, we conclude that, with probability  $1 - 3SAT_0^2\delta$ , for any  $t \leq T_0$ , it holds that  $\mathcal{R}(\text{mdp}(P^{(x,y)}, \mathbf{1}_y), t) \leq 34DS\sqrt{AT_0\gamma}$ .

With a slight abuse of notations, we use  $reg_{s,a}$  to denote the single step regret for  $\text{mdp}(P^{(x,y)}, \mathbf{1}_y)$ . Noting that  $sp(h^{(1)}) = \frac{D_y}{1+D_{xy}} \leq D$ , according to (19) in Lemma 12, for any  $t \leq T_0$  it holds that

$$\mathcal{R}(\text{mdp}(P^{(x,y)}, \mathbf{1}_y), t) - \sum_{i=1}^t reg_{s_i, a_i} \geq -2\sqrt{T_0\gamma}D - D \geq -34DS\sqrt{AT_0\gamma}$$

with probability  $1 - \delta$ . Therefore, we conclude that with probability  $1 - 4SAT_0^2\delta$ , it holds that  $|\mathcal{R}(\text{mdp}(P^{(x,y)}, \mathbf{1}_y), t)| \leq 34DS\sqrt{AT_0\gamma}$  for any  $t \leq T_0$ .

---

**Algorithm 3** LD: Learn the Diameter
 

---

**Input:**  $T_0, \delta_0, x \neq y \in \mathcal{S}$   
 $t \leftarrow 1, I_{x,y}(t) \leftarrow 0, t_{lu}^{(1)} \leftarrow 1, t_{lu}^{(2)} \leftarrow 1, \pi^{(1)}(s), \pi^{(2)}(s) \leftarrow \text{arbitrary policy}, \forall s;$   
 $N_{s,a}^{(1)}(t) \leftarrow 0, N_{s,a}^{(2)}(t) \leftarrow 0, N_{s,a,s'}^{(1)}(t) \leftarrow 0, N_{s,a,s'}^{(2)}(t) \leftarrow 0, \hat{P}_{s,a,s'}^{(1)}(t) \leftarrow 0, \hat{P}_{s,a,s'}^{(2)}(t) \leftarrow 0,$   
 $\forall s, a, s';$   
**if** current state is not  $x$  **then**  
    $r^{(t)} \leftarrow \mathbf{1}_x;$   
**else**  
    $r^{(t)} \leftarrow \mathbf{1}_y;$   
**end if**  
**for**  $t = 1, 2, \dots, T_0$  **do**  
   **if**  $r^{(t)} = \mathbf{1}_x$  **then**  
    $I_{x,y}(t) \leftarrow 0;$   
   **if**  $\exists(s, a), \text{ s.t. } N_{s,a}^{(1)}(t) \geq 2N_{s,a}^{(1)}(t_{lu}^{(1)})$  or  $t = 1$  **then**  
    $t_{lu}^{(1)} \leftarrow t;$   
   update  $\mathcal{P}$  as:  $\mathcal{P} = \{P' | \forall(s, a), |P'_{s,a} - \hat{P}_{s,a}^{(1)}(t)|_1 \leq \sqrt{\frac{14SA \log(2AT_0/\delta_0)}{\max\{N_{s,a}^{(1)}(t), 1\}}}\}$   
    $P_1 \leftarrow \arg \max_{Q \in \mathcal{P}} \rho(\text{mdp}(Q^{(x,y)}, \mathbf{1}_x));$   
    $\pi^{(1)} \leftarrow \text{optimal policy for } \text{mdp}(P_1^{(x,y)}, \mathbf{1}_x);$   
   **end if**  
   Execute  $\pi^{(1)}(s_t)$ , get  $r_t = r^{(t)}(s_t, a_t)$  and transits to  $s_{t+1};$   
   **if**  $s_{t+1} = x$  **then**  
    $r^{(t+1)} = \mathbf{1}_y$   
   **end if**  
   **else**  
    $I_{x,y}(t) \leftarrow 1;$   
   **if**  $\exists(s, a), \text{ s.t. } N_{s,a}^{(2)}(t) \geq 2N_{s,a}^{(2)}(t_{lu}^{(2)})$  or  $t = 0$  **then**  
    $t_{lu}^{(2)} \leftarrow t;$   
   update  $\mathcal{P}$  as:  $\mathcal{P} = \{P' | \forall(s, a), |P'_{s,a} - \hat{P}_{s,a}^{(2)}(t)|_1 \leq \sqrt{\frac{14SA \log(2AT_0/\delta_0)}{\max\{N_{s,a}^{(2)}(t), 1\}}}\}$   
    $P_2 \leftarrow \arg \max_{Q \in \mathcal{P}} \rho(\text{mdp}(Q^{(y,x)}, \mathbf{1}_y));$   
    $\pi^{(2)} \leftarrow \text{optimal policy for } M'_2;$   
   **end if**  
   Execute  $\pi^{(2)}(s_t)$ , get  $r_t = r^{(t)}(s_t, a_t)$  and transits to  $s_{t+1};$   
   **if**  $s_{t+1} = y$  **then**  
    $r^{(t+1)} = \mathbf{1}_x$   
   **end if**  
   **end if**  
   Update:  
    $N_{s,a}^{(1)}(t+1) = \sum_{i=1}^t I[s_t = s, a_t = a, r^{(i)} = \mathbf{1}_x]; N_{s,a}^{(2)}(t) = \sum_{i=1}^t I[s_t = s, a_t = a, r^{(i)} = \mathbf{1}_y]$   
    $N_{s,a,s'}^{(1)}(t+1) = \sum_{i=1}^t I[s_t = s, a_t = a, s_{t+1} = s', r^{(i)} = \mathbf{1}_x]; N_{s,a,s'}^{(2)}(t+1) = \sum_{i=1}^t I[s_t = s, a_t = a, s_{t+1} = s', r^{(i)} = \mathbf{1}_y];$   
    $\hat{P}_{s,a,s'}^{(1)}(t+1) = \frac{N_{s,a,s'}^{(1)}(t+1)}{\max\{N_{s,a}^{(1)}(t+1), 1\}}; \hat{P}_{s,a,s'}^{(2)}(t+1) = \frac{N_{s,a,s'}^{(2)}(t+1)}{\max\{N_{s,a}^{(2)}(t+1), 1\}}.$   
   **end for**  
**Return:**  $(\frac{|\{t | r_t = \mathbf{1}_y\}|}{|\{t | s_t = y, r^{(t-1)} = \mathbf{1}_y\}|}, \frac{|\{t | r_t = \mathbf{1}_x\}|}{|\{t | s_t = x, r^{(t-1)} = \mathbf{1}_x\}|}).$

---
